# Supplementary material
Source: PubMed Central journal article supplement (PMC29333)
Supplement: pnas_98_4_1775__3.pdf [file pnas_98_4_1775__3.pdf]

**Table 1. Percentage identity of IgM<sub>1gj</sub> CH domains to conventional (conv) IgM CH domains**

|                    | CH1 <sub>conv</sub> | CH2 <sub>conv</sub> | CH3 <sub>conv</sub> | CH4 <sub>conv</sub> |
|--------------------|---------------------|---------------------|---------------------|---------------------|
| CH1 <sub>1gj</sub> | <b>53.8</b>         | 26.9                | 25.0                | 22.4                |
| CH2 <sub>1gj</sub> | 23.7                | 23.2                | <b>54.9</b>         | 24.2                |
| CH3 <sub>1gj</sub> | 31.8                | 23.1                | 30.7                | <b>77.9</b>         |

Each constant domain of IgM<sub>1gj</sub> was aligned with each constant domain of conventional IgM (Genbank accession number M92851) in CLUSTALW. Highest percentage identity is noted with greatest identity in bold typeface. Note that bolded values closely match the Genbank results in the Fig. 2A domain alignment.
