# Supplementary material
Source: PubMed Central journal article supplement (PMC29333)

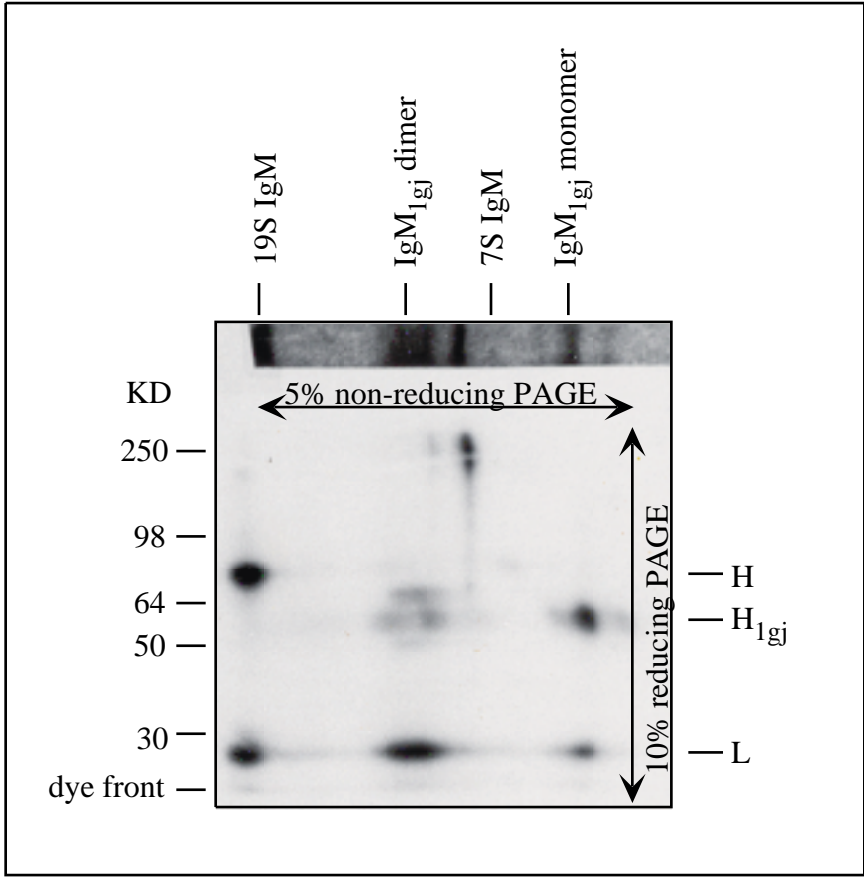

Supplement: pnas_98_4_1775__2.pdf [file pnas_98_4_1775__2.pdf]

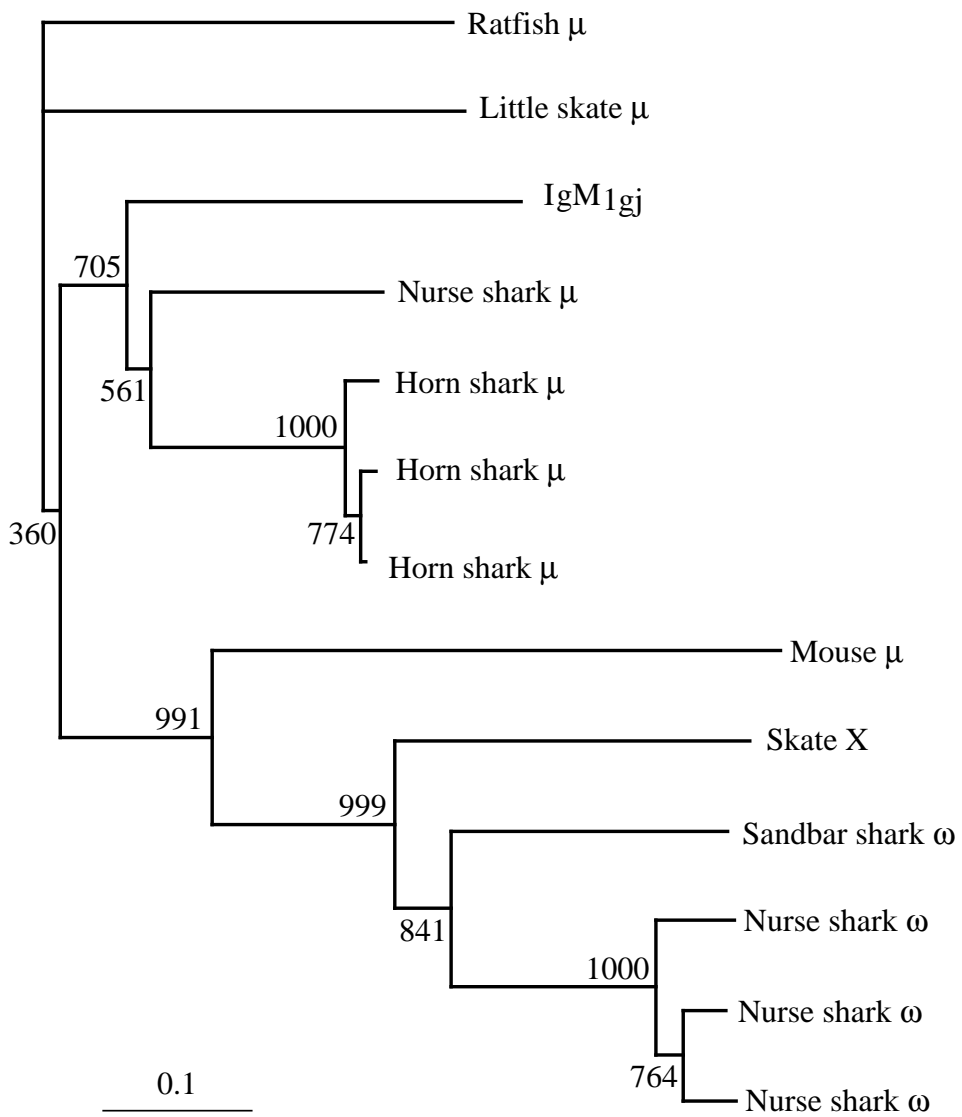

Supplement: pnas_98_4_1775__5.pdf [file pnas_98_4_1775__5.pdf]
